# Supplementary material for: Bacterial release from pipe biofilm in a full-scale drinking water distribution system
Source: PubMed Central journal article supplement (PMC6385293; doi:10.1038/s41522-019-0082-9), 2019-02-22
Supplement: 41522_2019_82_MOESM1_ESM.pdf [file 41522_2019_82_MOESM1_ESM.pdf]

# Supplementary Information - Figures

## **Bacterial release from pipe biofilm in a full-scale drinking water distribution system**

Sandy Chan<sup>a,b,c</sup>, Kristjan Pullerits<sup>a,b,c</sup>, Alexander Keucken<sup>d,e</sup>, Kenneth M. Persson<sup>b,c,d</sup>, Catherine J. Paul<sup>a,d\*</sup>, Peter Rådström<sup>a</sup>

<sup>a</sup>Applied Microbiology, Department of Chemistry, Lund University, P.O. Box 124, SE-221 00 Lund, Sweden

<sup>b</sup>Sweden Water Research AB, Ideon Science Park, Scheelevägen 15, SE-223 70 Lund, Sweden

<sup>c</sup>Sydvatten AB, Hyllie Stationstorg 21, SE-215 32 Malmö, Sweden

<sup>d</sup>Water Resources Engineering, Department of Building and Environmental Technology, Lund University, P.O. Box 118, SE-221 00 Lund, Sweden

<sup>e</sup>Vatten & Miljö i Väst AB, Box 110, 311 22 Falkenberg, Sweden

*\*corresponding author*

### **Table of Contents**

Supplementary Figure 1 – Changes in high nucleic acid (HNA) content bacteria in DWDS

Supplementary Figure 2 – Intact cell concentrations in the DWTP and DWDS

Supplementary Figure 3 – Relative abundance of bacteria in the different samples at the class level

Supplementary Figure 4 – Rarefaction curves

Supplementary Figure 5 – TCC of the distributed water samples after UF installation

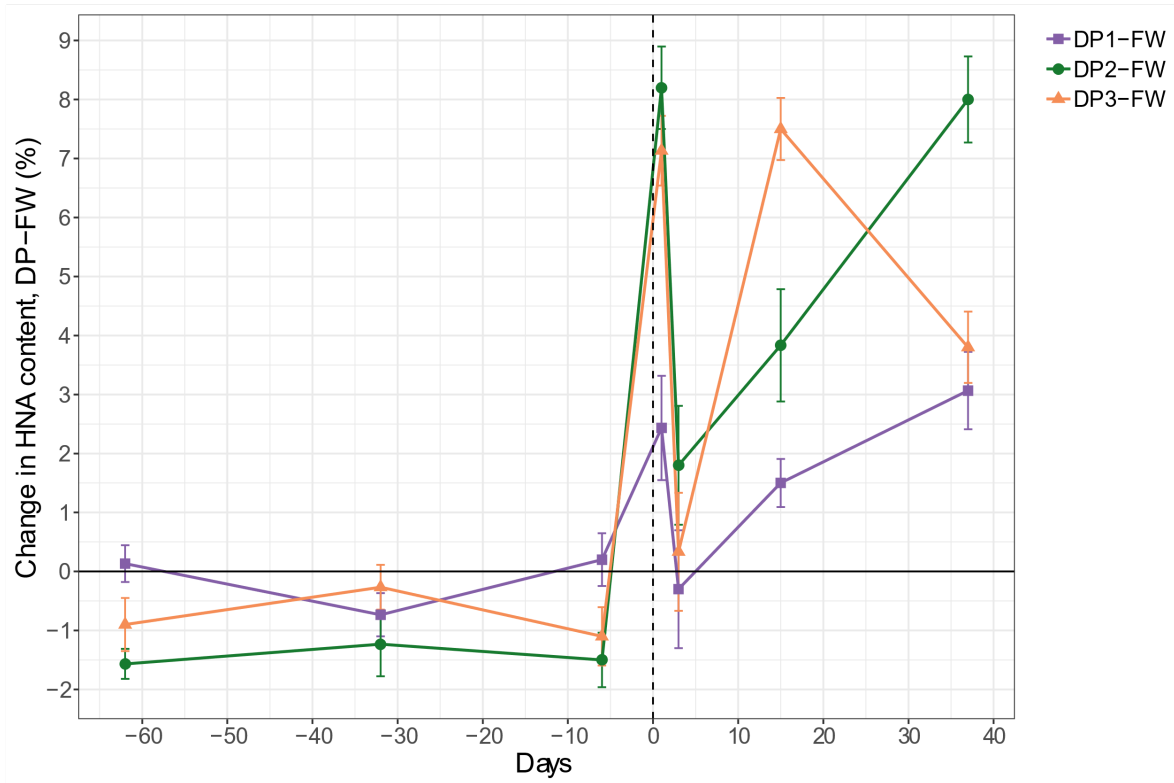

**Supplementary Figure 1** – Changes in high nucleic acid (HNA) content bacteria showing an increase in % HNA in distributed water following installation of UF. For each sample, the %HNA in the finished water was subtracted from that measured at DP1 (purple line, squares), DP2 (green line, circles) and DP3 (orange line, triangles) in the distribution system, before and after the installation of UF. Day 0 on the x-axis corresponds to the start of UF (vertical dashed line). Error bars represent the variation in technical triplicates.

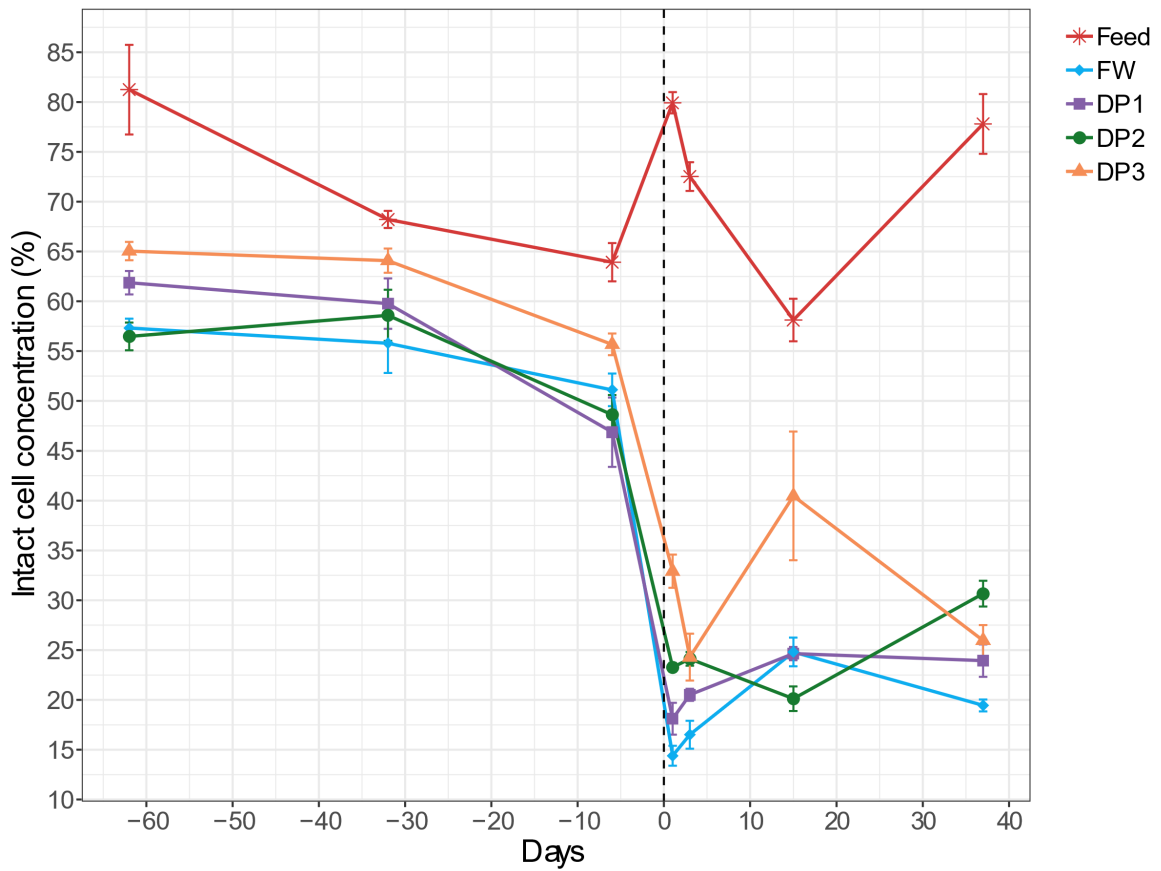

**Supplementary Figure 2** – Intact cell concentration measured at the treatment plant for feed water to the UF (red line, stars), finished water (FW, blue line, diamonds), and at DP1 (purple line, squares), DP2 (green line, circles) and DP3 (orange line, triangles) in the distribution system, before and after the installation of UF. The days on the x-axis corresponds to a start of ultrafiltration at day 0 (vertical dashed line). Error bars represent the variation in technical triplicates.

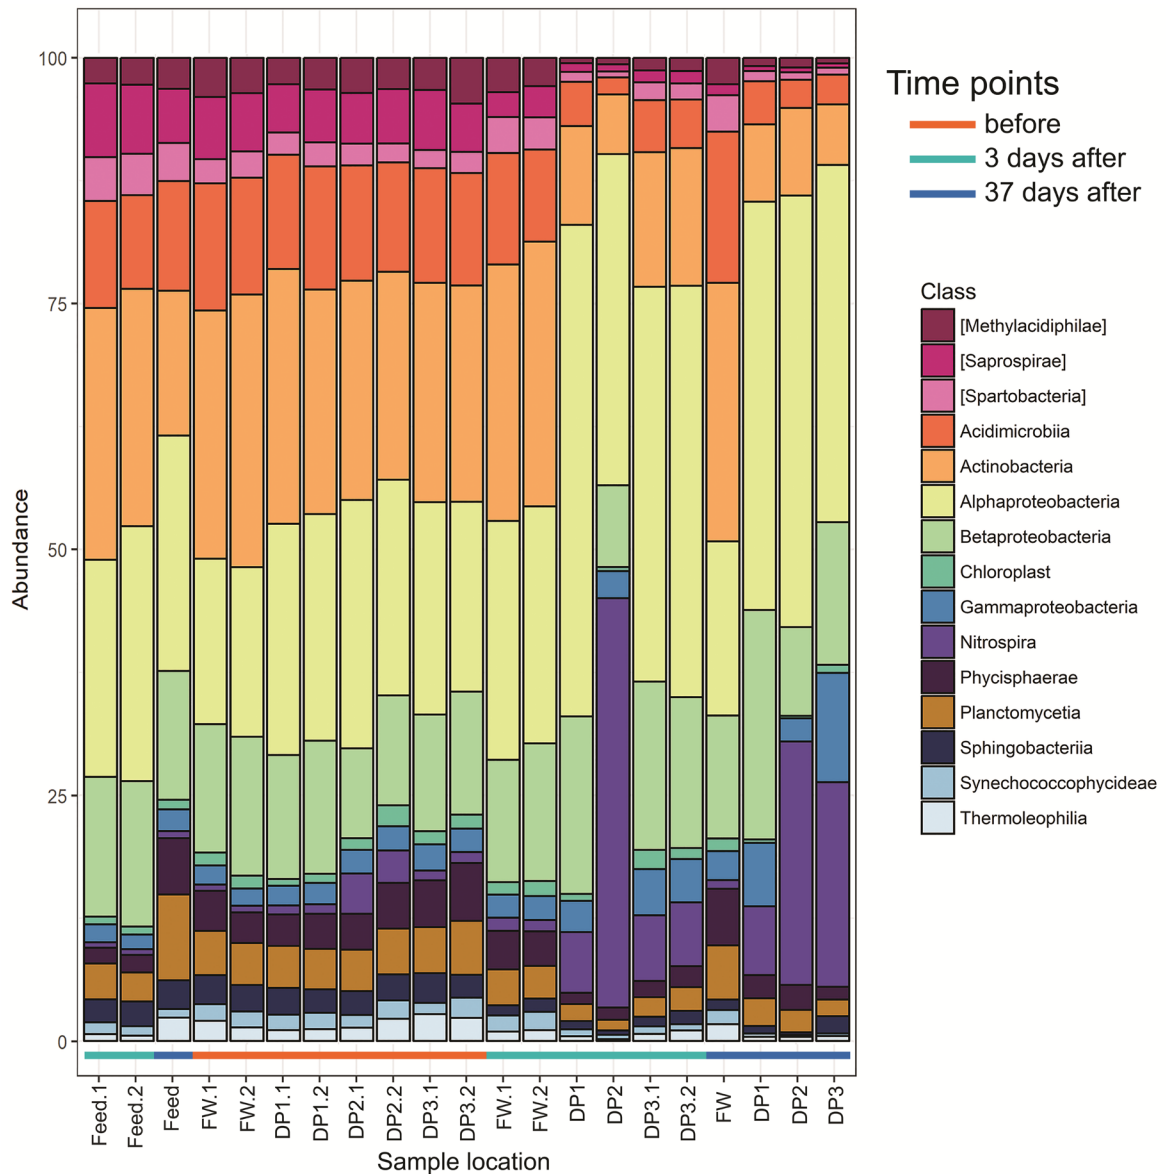

**Supplementary Figure 3** – Relative abundance of bacteria in the different samples at the class level. Top 15 most relative abundant classes which contribute to at least 1 % of total reads across all the samples are presented. At each location, one sample was taken before the installation of ultrafiltration (orange line) and two were taken at three and 37 days after the installation (UF1, green line and UF2, blue line). Biological replicates are indicated by a number following the decimal, if included i.e. DP1.1 and DP1.2.

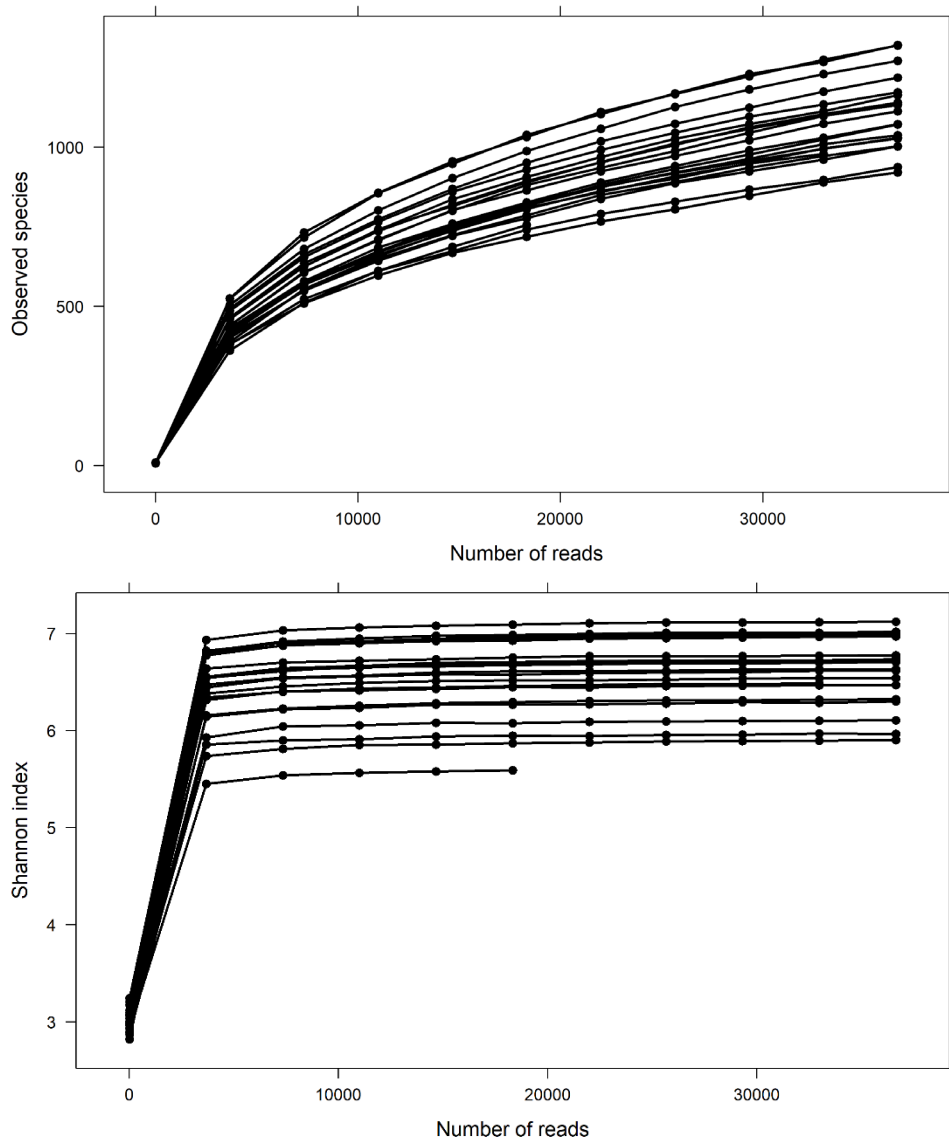

**Supplementary Figure 4** – Rarefaction curves based on observed species (number of OTUs) (top) and Shannon index (bottom) for all the 21 samples.

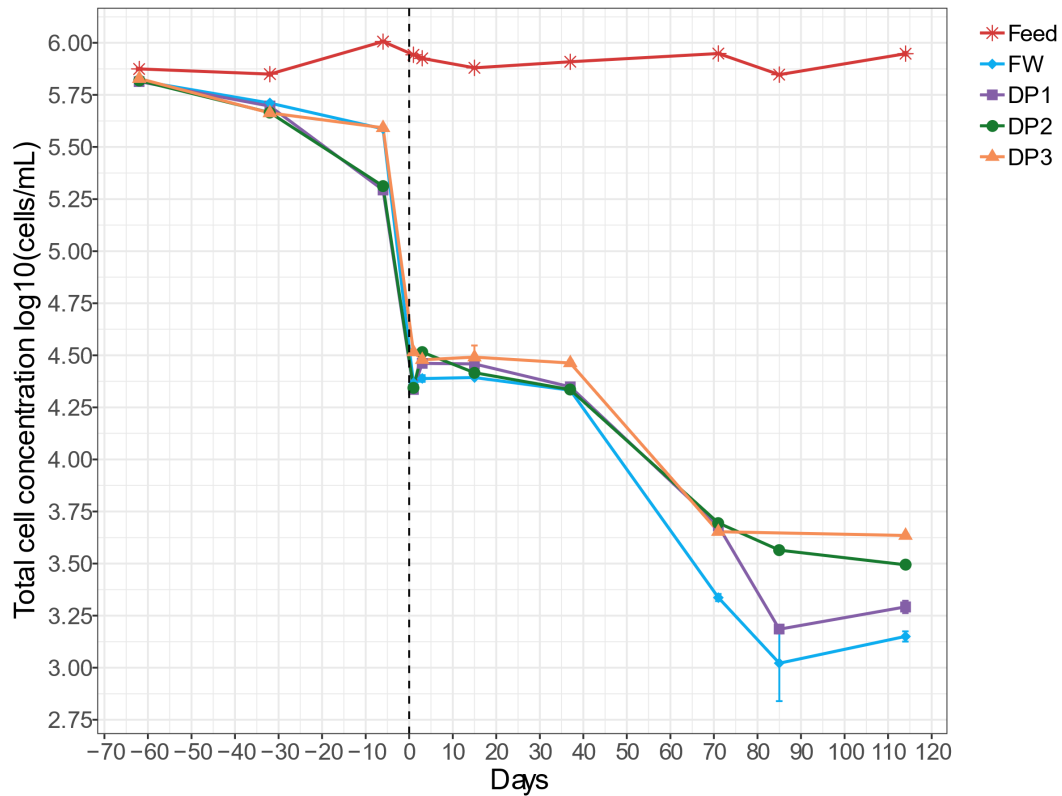

**Supplementary Figure 5** – TCC of the distributed water samples before and after UF

installation shows an initial drop between days 0 and 37, when feed water was still used for pH regulation, and a final lower plateau, when only UF-treated water was distributed (day 71-114). TCC is shown for feed water to the UF (red line, stars), finished water (FW, blue line, diamonds), and at DP1 (purple line, squares), DP2 (green line, circles) and DP3 (orange line, triangles). Day 0 on the x-axis corresponds to the start of the UF (vertical dashed line). Error bars represent the variation in technical triplicates.

# Supplementary Information - Tables

## **Bacterial release from pipe biofilm in a full-scale drinking water distribution system**

Sandy Chan<sup>a,b,c</sup>, Kristjan Pullerits<sup>a,b,c</sup>, Alexander Keucken<sup>d,e</sup>, Kenneth M. Persson<sup>b,c,d</sup>, Catherine J. Paul<sup>a,d\*</sup>, Peter Rådström<sup>a</sup>

<sup>a</sup>Applied Microbiology, Department of Chemistry, Lund University, P.O. Box 124, SE-221 00 Lund, Sweden

<sup>b</sup>Sweden Water Research AB, Ideon Science Park, Scheelevägen 15, SE-223 70 Lund, Sweden

<sup>c</sup>Sydvatten AB, Hyllie Stationstorg 21, SE-215 32 Malmö, Sweden

<sup>d</sup>Water Resources Engineering, Department of Building and Environmental Technology, Lund University, P.O. Box 118, SE-221 00 Lund, Sweden

<sup>e</sup>Vatten & Miljö i Väst AB, Box 110, 311 22 Falkenberg, Sweden

*\*corresponding author*

### **Table of Contents**

Supplementary Table 1 – Output data from DESeq2 combined with the taxonomic annotation of the different OTUs.

Supplementary Table 2 – Conventional chemical and microbial water quality parameters

Supplementary Table 3 – Natural organic matter content

**Supplementary Table 1** – Output data from DESeq2 combined with the taxonomic annotation of the different OTUs.

| OTU                           | baseMean  | log2FoldChange | pvalue   | padj     | Kingdom  | Phylum         | Class               | Order            | Family            | Genus           |
|-------------------------------|-----------|----------------|----------|----------|----------|----------------|---------------------|------------------|-------------------|-----------------|
| 807415                        | 433.5328  | 9.4932781      | 1.43E-09 | 5.85E-09 | Bacteria | Proteobacteria | Alphaproteobacteria | Rhodobacterales  | Rhodobacteraceae  | Rhodobacter     |
| New.ReferenceOTU164           | 2076.0738 | 9.3259966      | 2.71E-06 | 9.38E-06 | Bacteria | Proteobacteria | Alphaproteobacteria | NA               | NA                | NA              |
| 328951                        | 1739.4879 | 8.9535161      | 2.00E-12 | 1.13E-11 | Bacteria | Nitrospirae    | Nitrospira          | Nitrospirales    | Nitrospiraceae    | Nitrospira      |
| 264343                        | 975.2421  | 8.8871578      | 1.15E-12 | 6.88E-12 | Bacteria | Nitrospirae    | Nitrospira          | Nitrospirales    | Nitrospiraceae    | Nitrospira      |
| 554981                        | 984.9402  | 8.8368927      | 1.32E-13 | 9.17E-13 | Bacteria | Proteobacteria | Betaproteobacteria  | NA               | NA                | NA              |
| 1143858                       | 306.662   | 8.7966979      | 1.52E-10 | 7.21E-10 | Bacteria | Cyanobacteria  | 4C0d-2              | MLE1-12          | NA                | NA              |
| New.ReferenceOTU371           | 230.3143  | 8.7659308      | 2.21E-18 | 2.49E-17 | NA       | NA             | NA                  | NA               | NA                | NA              |
| New.ReferenceOTU202           | 341.3616  | 8.7516688      | 1.17E-30 | 2.64E-29 | Bacteria | Proteobacteria | Alphaproteobacteria | Rhizobiales      | Hyphomicrobiaceae | Hyphomicrobium  |
| 570344                        | 300.7408  | 8.5713684      | 6.28E-16 | 5.03E-15 | Bacteria | Proteobacteria | Alphaproteobacteria | Rickettsiales    | NA                | NA              |
| New.CleanUp.ReferenceOTU32754 | 189.374   | 8.5244266      | 2.90E-05 | 9.66E-05 | Bacteria | Acidobacteria  | Solibacteres        | Solibacterales   | NA                | NA              |
| 1062748                       | 598.0293  | 8.4899176      | 1.20E-10 | 6.01E-10 | Bacteria | Actinobacteria | Actinobacteria      | Actinomycetales  | Mycobacteriaceae  | Mycobacterium   |
| 4470200                       | 2036.6014 | 8.4408388      | 1.71E-13 | 1.10E-12 | Bacteria | Nitrospirae    | Nitrospira          | Nitrospirales    | Nitrospiraceae    | Nitrospira      |
| 233724                        | 1664.9664 | 8.2719846      | 8.54E-21 | 1.28E-19 | Bacteria | Proteobacteria | Alphaproteobacteria | Rickettsiales    | NA                | NA              |
| New.ReferenceOTU24            | 404.3908  | 8.1076291      | 2.86E-11 | 1.51E-10 | Bacteria | Nitrospirae    | Nitrospira          | Nitrospirales    | Nitrospiraceae    | Nitrospira      |
| New.ReferenceOTU155           | 395.014   | 8.049085       | 1.68E-08 | 6.03E-08 | Bacteria | Proteobacteria | Gammaproteobacteria | Legionellales    | Coxiellaceae      | NA              |
| 134302                        | 1951.4365 | 7.9683312      | 6.70E-16 | 5.03E-15 | Bacteria | Proteobacteria | Alphaproteobacteria | Rhizobiales      | Hyphomicrobiaceae | Hyphomicrobium  |
| 109789                        | 4244.9859 | 7.9368478      | 6.56E-10 | 2.81E-09 | Bacteria | Nitrospirae    | Nitrospira          | Nitrospirales    | Nitrospiraceae    | Nitrospira      |
| 568617                        | 388.9368  | 7.9347294      | 1.08E-08 | 4.05E-08 | Bacteria | Proteobacteria | Alphaproteobacteria | Rhodospirillales | Rhodospirillaceae | NA              |
| 812978                        | 274.1116  | 7.7282295      | 2.80E-09 | 1.09E-08 | Bacteria | Proteobacteria | Alphaproteobacteria | Rhizobiales      | NA                | NA              |
| New.ReferenceOTU480           | 163.8361  | 7.3352637      | 1.53E-03 | 4.76E-03 | Bacteria | Proteobacteria | Betaproteobacteria  | Burkholderiales  | Oxalobacteraceae  | NA              |
| 564600                        | 503.6496  | 7.3197144      | 1.20E-37 | 3.59E-36 | Bacteria | Proteobacteria | Alphaproteobacteria | Rhizobiales      | Hyphomicrobiaceae | Hyphomicrobium  |
| 564309                        | 646.4925  | 6.5569246      | 1.02E-24 | 1.83E-23 | Bacteria | Proteobacteria | Alphaproteobacteria | Rickettsiales    | Rickettsiaceae    | NA              |
| 1108960                       | 4063.7182 | 6.1449385      | 1.56E-67 | 7.00E-66 | Bacteria | Proteobacteria | Alphaproteobacteria | Sphingomonadales | Sphingomonadaceae | Sphingomonas    |
| 1003206                       | 2011.4925 | 5.9889776      | 3.98E-83 | 3.58E-81 | Bacteria | Proteobacteria | Alphaproteobacteria | Sphingomonadales | Sphingomonadaceae | Sphingomonas    |
| 37092                         | 261.3607  | 5.5880807      | 1.76E-10 | 7.91E-10 | Bacteria | Proteobacteria | Alphaproteobacteria | Sphingomonadales | Sphingomonadaceae | Novosphingobium |
| 692284                        | 1317.3855 | 5.5199871      | 2.84E-18 | 2.84E-17 | Bacteria | Proteobacteria | Betaproteobacteria  | Nitrosomonadales | Nitrosomonadaceae | NA              |
| 112204                        | 688.4011  | 5.3544386      | 7.60E-18 | 6.84E-17 | Bacteria | Proteobacteria | Betaproteobacteria  | Nitrosomonadales | Nitrosomonadaceae | NA              |
| New.ReferenceOTU205           | 1093.1424 | 5.2954801      | 1.22E-18 | 1.57E-17 | Bacteria | Proteobacteria | Betaproteobacteria  | Nitrosomonadales | Nitrosomonadaceae | NA              |



---

|                            |          |           |          |          |          |                |                    |                 |                |               |
|----------------------------|----------|-----------|----------|----------|----------|----------------|--------------------|-----------------|----------------|---------------|
| <b>321513</b>              | 232.0724 | 0.9203116 | 1.32E-03 | 4.23E-03 | Bacteria | Nitrospirae    | Nitrospira         | Nitrospirales   | Nitrospiraceae | Nitrospira    |
| <b>New.ReferenceOTU167</b> | 114.5191 | -0.471999 | 1.88E-03 | 5.63E-03 | Bacteria | Proteobacteria | Betaproteobacteria | Burkholderiales | Comamonadaceae | Limnohabitans |

---

**Supplementary Table 2** – Conventional chemical and microbial water quality parameters measured before (day -6) and after (day 3 and day 37) the installation of UF. Samples were taken from the different sampling points in the drinking water treatment plant (feed and finished water) and distribution system (DP1, DP2 and DP3).

| Sampling day                           | -6     |                |        |        |        | 3      |                |        |        |        | 37     |                |        |        |        |
|----------------------------------------|--------|----------------|--------|--------|--------|--------|----------------|--------|--------|--------|--------|----------------|--------|--------|--------|
| Sampling point                         | Feed   | Finished water | DP1    | DP2    | DP3    | Feed   | Finished water | DP1    | DP2    | DP3    | Feed   | Finished water | DP1    | DP2    | DP3    |
| Alkalinity (mg HCO <sub>3</sub> /L)    | 22     | 56             | 55     | 55     | 54     | 19     | 58             | 61     | 62     | 61     | 20     | 61             | 61     | 61     | 61     |
| Aluminium (mg/L)                       | 0.014  | 0.014          | 0.017  | 0.016  | 0.018  | 0.016  | 0.029          | 0.029  | 0.031  | 0.029  | 0.017  | 0.024          | 0.023  | 0.024  | 0.025  |
| Ammonium (mg/L)                        | 0.005  | 0.062          | 0.035  | 0.033  | 0.026  | 0.005  | 0.049          | 0.027  | 0.023  | 0.03   | 0.005  | 0.058          | 0.027  | 0.042  | 0.022  |
| Ammonium-nitrogen (mg/L)               | 0.005  | 0.048          | 0.027  | 0.026  | 0.02   | 0.005  | 0.038          | 0.021  | 0.018  | 0.023  | 0.005  | 0.045          | 0.021  | 0.033  | 0.017  |
| COD-Mn (mg O <sub>2</sub> /L)          | 2.3    | 2.1            | 2.1    | 2.1    | 2.1    | 1.9    | 1.2            | 1.2    | 1.3    | 1.2    | 2.3    | 1.3            | 1.3    | 1.3    | 1.4    |
| DOC (mg/L)                             | 2.8    | 2.5            | 2.4    | 2.5    | 2.7    | 2.8    | 1              | 1      | 1      | 1      | 2.5    | 1              | 1      | 1      | 1      |
| <i>Escherichia coli</i> (CFU/100 mL)   | 0.5    | 0.5            | 0.5    | 0.5    | 0.5    | 0.5    | 0.5            | 0.5    | 0.5    | 0.5    | 0.5    | 0.5            | 0.5    | 0.5    | 0.5    |
| Phosphorus (mg/L)                      | 0.0025 | 0.0025         | 0.0062 | 0.0058 | 0.0025 | 0.0025 | 0.0025         | 0.0025 | 0.0077 | 0.0025 | 0.0025 | 0.0025         | 0.0025 | 0.0025 | 0.0025 |
| Color 410 nm (mg Pt/L)                 | 13     | 11             | 9.5    | 8.7    | 12     | 11     | 2.5            | 2.5    | 2.5    | 2.5    | 11     | 2.5            | 2.5    | 2.5    | 2.5    |
| Iron (mg/L)                            | 0.01   | 0.01           | 0.01   | 0.01   | 0.01   | 0.029  | 0.01           | 0.01   | 0.01   | 0.01   | 0.021  | 0.01           | 0.01   | 0.01   | 0.01   |
| Calcium (mg/L)                         | 8.2    | 19             | 20     | 20     | 19     | 7.5    | 21             | 21     | 21     | 21     | 7.6    | 21             | 22     | 21     | 22     |
| Coliforms (CFU/100 mL)                 | 0.5    | 0.5            | 0.5    | 0.5    | 0.5    | 0.5    | 0.5            | 0.5    | 0.5    | 0.5    | 0.5    | 0.5            | 0.5    | 0.5    | 0.5    |
| Conductivity (mS/m)                    | 11     | 16             | 16     | 16     | 16     | 11     | 17             | 17     | 17     | 17     | 11     | 17             | 17     | 17     | 17     |
| Copper (mg/L)                          | 0.01   | 0.01           | 0.01   | 0.01   | 0.01   | 0.01   | 0.01           | 0.01   | 0.026  | 0.01   | 0.01   | 0.01           | 0.01   | 0.026  | 0.01   |
| Heterotrophic bacteria 7 days (CFU/mL) | 17     | 0.5            | 0.5    | 5      | 6      | 29     | 0.5            | 1      | 3      | 22     | 18     | 0.5            | 0.5    | 3      | 3      |
| Magnesium (mg/L)                       | 2.3    | 2.4            | 2.5    | 2.4    | 2.4    | 2.2    | 2.2            | 2.2    | 2.2    | 2.1    | 2.4    | 2.4            | 2.4    | 2.3    | 2.3    |
| Manganese (mg/L)                       | 0.06   | 0.059          | 0.056  | 0.053  | 0.05   | 0.034  | 0.033          | 0.033  | 0.033  | 0.029  | 0.014  | 0.013          | 0.013  | 0.012  | 0.012  |
| Nitrate (mg/L)                         | 1.5    |                |        |        | 1.5    | 1.5    | 1.9            | 1.9    | 1.4    | 1.3    | 1.5    | 1.4            | 1.4    | 1.5    | 1.4    |
| Nitrite (mg/L)                         | 0.035  | 0.0035         | 0.069  | 0.046  | 0.079  | 0.035  | 0.0035         | 0.059  | 0.03   | 0.056  | 0.035  | 0.0035         | 0.069  | 0.036  | 0.072  |
| Heterotrophic bacteria 3 days (CFU/mL) | 13     | 0.5            | 0.5    | 0.5    | 2      | 10     | 0.5            | 0.5    | 0.5    | 0.5    | 8      | 0.5            | 0.5    | 0.5    | 0.5    |
| pH                                     | 7.5    | 8              | 8.2    | 8.1    | 8      | 7.3    | 8              | 8.1    | 8      | 8      | 7.3    | 8.1            | 8.2    | 8.1    | 8      |
| TOC (mg/L)                             | 2.9    | 2.7            | 2.7    | 2.7    | 2.7    | 2.8    | 2              | 2.1    | 2.1    | 2      | 2.7    | 1              | 1      | 1      | 1      |
| Hardness (°dH)                         | 1.7    | 3.1            | 3.3    | 3.3    | 3.2    | 1.6    | 3.4            | 3.5    | 3.4    | 3.4    | 1.6    | 3.5            | 3.6    | 3.5    | 3.6    |
| Turbidity (FNU)                        | 0.21   | 0.05           | 0.29   | 0.3    | 0.2    | 0.22   | 0.14           | 0.48   | 0.19   | 0.19   | 0.23   | 0.05           | 0.05   | 0.05   | 0.11   |
| Temperature (°C)                       | 6.9    | 6.7            | 7.4    | 9      | 8.2    | 6.2    | 6.3            | 7.2    | 8.7    | 7.3    | 5.7    | 5.7            | 6.8    | 8.2    | 6.7    |

**Supplementary Table 3** – Natural organic matter content before (day -6) and after (day 3 and day 37) the installation of UF for the different sampling points in the drinking water treatment plant (feed and finished water) and distribution system (DP1, DP2 and DP3).

| Sampling day                               | -6   |                |      |      |      | 3    |                |      |      |      | 37   |                |      |      |      |
|--------------------------------------------|------|----------------|------|------|------|------|----------------|------|------|------|------|----------------|------|------|------|
|                                            | Feed | Finished water | DP1  | DP2  | DP3  | Feed | Finished water | DP1  | DP2  | DP3  | Feed | Finished water | DP1  | DP2  | DP3  |
| <b>DOC (Dissolved OC) (ppb-C)</b>          | 2442 | 2308           | 2312 | 2321 | 2360 | 2445 | 1817           | 1871 | 1826 | 1821 | 2391 | 1674           | 1600 | 1608 | 1611 |
| <b>HOC (Hydrophobic OC) (ppb-C)</b>        | n.q. | n.q.           | 71   | n.q. | 38   | n.q. | 126            | 101  | 88   | 25   | n.q. | 81             | n.q. | 14   | 14   |
| <b>Inorganic colloids (m<sup>-1</sup>)</b> | n.q. | n.q.           | n.q. | n.q. | n.q. | n.q. | n.q.           | n.q. | n.q. | n.q. | n.q. | n.q.           | n.q. | n.q. | 0.03 |
| <b>SUVA (L/mg*m)</b>                       | 3.15 | 2.99           | 3.1  | 3.24 | 3.08 | 3.29 | 2.39           | 2.4  | 2.55 | 2.66 | 3.34 | 2.44           | 2.45 | 2.34 | 2.52 |
| <b>CDOC (Chromatographic DOC) (ppb-C)</b>  | 2442 | 2308           | 2241 | 2321 | 2322 | 2445 | 1690           | 1770 | 1738 | 1796 | 2391 | 1593           | 1600 | 1595 | 1598 |
| Biopolymers (ppb-C)                        | 65   | 45             | 27   | 38   | 39   | 65   | 24             | 34   | 30   | 30   | 57   | 31             | 35   | 29   | 25   |
| Dissolved organic nitrogen (DON) (ppb-N)   | 7    | 5              | 4    | 5    | 4    | 6    | n.q.           | n.q. | 4    | 5    | 6    | 4              | 4    | n.q. | n.q. |
| N/C ratio (µg/µg)                          | 0.1  | 0.11           | 0.14 | 0.14 | 0.11 | 0.09 | -              | -    | 0.12 | 0.15 | 0.11 | 0.12           | 0.1  | -    | -    |
| % proteins (% of biopolymer)               | 31   | 33             | 41   | 41   | 33   | 27   | -              | -    | 36   | 45   | 34   | 35             | 31   | -    | -    |
| Humic substances (ppb-C)                   | 1487 | 1472           | 1421 | 1466 | 1475 | 1564 | 957            | 970  | 956  | 983  | 1562 | 935            | 946  | 942  | 954  |
| Dissolved organic nitrogen (DON) (ppb-N)   | 31   | 32             | 32   | 32   | 32   | 31   | 21             | 22   | 23   | 22   | 32   | 20             | 21   | 19   | 20   |
| N/C ratio (µg/µg)                          | 0.02 | 0.02           | 0.02 | 0.02 | 0.02 | 0.02 | 0.02           | 0.02 | 0.02 | 0.02 | 0.02 | 0.02           | 0.02 | 0.02 | 0.02 |
| Aromaticity (L/mg*m)                       | 3.71 | 3.5            | 3.64 | 3.56 | 3.56 | 3.89 | 3.02           | 2.99 | 3.04 | 2.87 | 4.11 | 2.39           | 2.4  | 2.42 | 2.43 |
| Molecular weight (g/mol)                   | 647  | 566            | 640  | 581  | 601  | 606  | 523            | 525  | 522  | 524  | 685  | 476            | 477  | 482  | 478  |
| Building blocks (ppb-C)                    | 509  | 422            | 478  | 445  | 456  | 448  | 425            | 442  | 433  | 442  | 431  | 340            | 336  | 332  | 340  |
| LMW Neutrals (ppb-C)                       | 509  | 355            | 292  | 352  | 332  | 350  | 276            | 312  | 304  | 330  | 309  | 288            | 283  | 292  | 278  |
| LMW Acids (ppb-C)                          | 24   | 13             | 24   | 20   | 19   | 18   | 8              | 12   | 15   | 11   | 32   | 0              | n.q. | n.q. | 0    |

n.q. = not quantifiable (< 1 ppb; signal to noise ratio)
